# Supplementary material for: What can quantum chemistry tell us about Pa(v) hydration and hydrolysis?
Source: Royal Society of Chemistry journal article supplement (doi:10.1039/b806407e), 2008-01-01
Supplement: b806407e.pdf [file b806407e.pdf]

# What Can Quantum Chemistry Tell Us about Pa(V) Hydration and Hydrolysis?

## Supporting information

|                                      | SCF       | ZPE    | Entropy                                      |
|--------------------------------------|-----------|--------|----------------------------------------------|
|                                      | a.u.      | a.u.   | $\text{kJ}\cdot\text{mol}^{-1}\text{K}^{-1}$ |
| $\text{PaO}_2^+/5/10/6$              | -835.0752 | 0.5157 | 1318.2                                       |
| $\text{PaO}(\text{OH})_2^+/3/6/8$    | -783.3833 | 0.4577 | 1179.6                                       |
| $\text{PaO}(\text{OH})_2^+/4/8/4$    | -835.0611 | 0.5360 | 1286.5                                       |
| $\text{PaOOH}^{2+}/5/10/6$           | -835.3802 | 0.5458 | 1335.1                                       |
| $\text{Pa}(\text{OH})_4^+/2/4/13$    | -835.0493 | 0.5348 | 1287.8                                       |
| $\text{Pa}(\text{OH})_3^{2+}/4/8/8$  | -835.3606 | 0.5428 | 1361.4                                       |
| $\text{Pa}(\text{OH})_2^{3+}/5/10/4$ | -801.1384 | 0.5033 | 1276.1                                       |
| $\text{PaO}^{3+}/6/14$               | -801.1289 | 0.5068 | 1216.1                                       |
|                                      |           |        |                                              |

Table Sup.Inf 1 : SCF energy, zero point energy and entropy of clusters used to model reactions.

### 5 $\text{PaO}_2^+/5/10/6$

66

scf done: -835.075229

|    |    |           |           |           |
|----|----|-----------|-----------|-----------|
|    | Pa | 0.000000  | 0.000000  | 0.196929  |
|    | O  | 0.000000  | 1.893731  | 0.145956  |
| 10 | O  | 0.000000  | -1.893731 | 0.145956  |
|    | O  | 1.451046  | -0.392612 | 2.211480  |
|    | O  | 2.368306  | 0.229777  | -0.639129 |
|    | O  | 0.000000  | 0.000000  | -2.394701 |
|    | O  | -2.368306 | -0.229777 | -0.639129 |
| 15 | O  | -1.451046 | 0.392612  | 2.211480  |
|    | H  | 1.323743  | -1.269827 | 2.647570  |
|    | H  | 1.573396  | 0.287886  | 2.930725  |
|    | H  | 2.743919  | -0.535168 | -1.152153 |
|    | H  | 2.585496  | 1.068264  | -1.111419 |
| 20 | H  | -0.189031 | -0.776691 | -2.971607 |
|    | H  | 0.189031  | 0.776691  | -2.971607 |
|    | H  | -2.585496 | -1.068264 | -1.111419 |
|    | H  | -2.743919 | 0.535168  | -1.152153 |
|    | H  | -1.573396 | -0.287886 | 2.930725  |
| 25 | H  | -1.323743 | 1.269827  | 2.647570  |
|    | O  | 0.802127  | -2.844467 | 3.528745  |
|    | O  | 1.582469  | 1.510396  | 4.141572  |
|    | O  | 3.281361  | -2.020168 | -1.944637 |
|    | O  | 2.682131  | 2.764395  | -1.984667 |
| 30 | O  | -0.567497 | -2.381996 | -3.821161 |
|    | O  | 0.567497  | 2.381996  | -3.821161 |
|    | O  | -2.682131 | -2.764395 | -1.984667 |
|    | O  | -3.281361 | 2.020168  | -1.944637 |
|    | O  | -1.582469 | -1.510396 | 4.141572  |
| 35 | O  | -0.802127 | 2.844467  | 3.528745  |
|    | H  | 0.668156  | -3.651533 | 2.956247  |
|    | H  | 1.411035  | -3.113602 | 4.239844  |
|    | H  | 0.784672  | 2.083054  | 4.022865  |
|    | H  | 2.349452  | 2.103078  | 4.219042  |
| 40 | H  | 2.592530  | -2.707365 | -2.103732 |

|      |           |           |           |
|------|-----------|-----------|-----------|
| H    | 3.990102  | -2.462011 | -1.445019 |
| H    | 2.080940  | 2.672889  | -2.763013 |
| H    | 3.562034  | 2.986553  | -2.338293 |
| H    | 0.141310  | -3.015494 | -3.516019 |
| 5 H  | -0.591678 | -2.428071 | -4.793723 |
| H    | -0.141310 | 3.015494  | -3.516019 |
| H    | 0.591678  | 2.428071  | -4.793723 |
| H    | -2.080940 | -2.672889 | -2.763013 |
| H    | -3.562034 | -2.986553 | -2.338293 |
| 10 H | -2.592530 | 2.707365  | -2.103732 |
| H    | -3.990102 | 2.462011  | -1.445019 |
| H    | -0.784672 | -2.083054 | 4.022865  |
| H    | -2.349452 | -2.103078 | 4.219042  |
| H    | -0.668156 | 3.651533  | 2.956247  |
| 15 H | -1.411035 | 3.113602  | 4.239844  |
| O    | 0.388992  | -5.097697 | 2.011678  |
| O    | -0.388992 | 5.097697  | 2.011678  |
| H    | 0.013080  | -4.977164 | 1.103893  |
| H    | -0.002529 | -5.910265 | 2.375232  |
| 20 H | -0.013080 | 4.977164  | 1.103893  |
| H    | 0.002529  | 5.910265  | 2.375232  |
| O    | 1.250598  | -4.002447 | -2.581988 |
| O    | -1.250598 | 4.002447  | -2.581988 |
| H    | 0.655506  | -4.255270 | -1.808190 |
| 25 H | 1.595471  | -4.832666 | -2.957658 |
| H    | -0.655506 | 4.255270  | -1.808190 |
| H    | -1.595471 | 4.832666  | -2.957658 |
| H    | -0.303720 | -3.367728 | -0.231307 |
| O    | -0.462987 | -4.327231 | -0.543461 |
| 30 H | -1.382275 | -4.299975 | -0.879838 |
| H    | 0.303720  | 3.367728  | -0.231307 |
| O    | 0.462987  | 4.327231  | -0.543461 |
| H    | 1.382275  | 4.299975  | -0.879838 |

35

### **PaO(OH)<sub>2</sub><sup>+</sup>/3/6/8**

57

scf done: -783.383333

|       |           |           |           |
|-------|-----------|-----------|-----------|
| O     | -1.893212 | 0.149686  | -0.088146 |
| 40 Pa | -0.020983 | -0.044182 | -0.012366 |
| O     | 0.184410  | 2.251829  | -0.828025 |
| O     | -0.076401 | 0.559318  | 2.382263  |
| O     | 2.018921  | 0.029352  | -0.021612 |
| O     | 0.077044  | -2.075152 | 0.762343  |
| 45 O  | -0.044670 | -1.172921 | -2.205388 |
| O     | 2.719512  | 2.895758  | -1.041531 |
| O     | 2.631652  | -2.632324 | 1.012798  |
| O     | -4.137307 | 1.459112  | -0.596958 |
| O     | 4.684431  | -0.001059 | 0.011890  |
| 50 O  | -2.536446 | -0.476150 | 3.014590  |
| O     | -2.496372 | -2.383113 | -2.016385 |
| O     | -2.532232 | -2.868409 | 1.041091  |
| O     | -4.473167 | -0.541870 | -2.548950 |
| O     | -4.500612 | 1.267916  | 2.176923  |
| 55 O  | 3.769414  | 2.069627  | 1.666320  |
| O     | 3.784758  | 0.519186  | -2.591676 |
| O     | 2.612349  | -2.173414 | -1.936411 |

|      |           |           |           |
|------|-----------|-----------|-----------|
| O    | 2.567922  | -0.368079 | 2.901305  |
| O    | -2.144675 | 3.877091  | -1.039218 |
| H    | -0.761977 | -2.579199 | 0.947411  |
| H    | 0.749464  | -1.751800 | -2.307074 |
| 5 H  | -0.881381 | -1.716133 | -2.293736 |
| H    | 1.116632  | 2.639714  | -0.956376 |
| H    | -0.528289 | 2.915168  | -0.986941 |
| H    | 0.713927  | 0.192772  | 2.849014  |
| H    | -0.915829 | 0.203763  | 2.796129  |
| 10 H | 3.027889  | -2.948388 | -2.357007 |
| H    | 2.735355  | -2.302998 | -0.960719 |
| H    | -4.517683 | 0.221389  | -1.920625 |
| H    | -5.390573 | -0.782235 | -2.765534 |
| H    | 2.704046  | -1.114540 | 2.260160  |
| 15 H | 2.953434  | -0.673185 | 3.743007  |
| H    | -4.536982 | 1.391716  | 1.194632  |
| H    | -5.421121 | 1.202501  | 2.485213  |
| H    | 1.623288  | -2.633327 | 0.995618  |
| H    | 2.914825  | -3.503920 | 1.342722  |
| 20 H | -3.271416 | 0.984918  | -0.419291 |
| H    | -3.862306 | 2.344778  | -0.906605 |
| H    | -2.238901 | 4.433162  | -0.242726 |
| H    | -2.227743 | 4.488821  | -1.794886 |
| H    | 3.074418  | 2.183494  | -1.619716 |
| 25 H | 3.071178  | 2.700909  | -0.143607 |
| H    | 4.854820  | 0.258710  | -0.918402 |
| H    | 4.847509  | 0.794546  | 0.561771  |
| H    | 3.027014  | -0.051783 | 0.021767  |
| H    | 4.086348  | 2.708969  | 2.329213  |
| 30 H | 3.306597  | 1.353441  | 2.162088  |
| H    | 4.098205  | 0.577128  | -3.512065 |
| H    | 3.323899  | -0.347871 | -2.504727 |
| H    | -2.747196 | -2.638509 | 0.112409  |
| H    | -2.760929 | -2.078863 | 1.575411  |
| 35 H | -3.217461 | -1.725815 | -2.231614 |
| H    | -2.728279 | -3.200056 | -2.494056 |
| H    | -3.253829 | 0.160214  | 2.734326  |
| H    | -2.780051 | -0.778002 | 3.908358  |

40 **PaO(OH)<sub>2</sub><sup>+</sup>/4/8/4**

66

scf done: -835.061067

|      |           |           |           |
|------|-----------|-----------|-----------|
| Pa   | 0.436559  | -0.373324 | -0.188298 |
| O    | -1.592376 | 0.022596  | -0.016937 |
| 45 O | 2.278992  | -0.583964 | -0.495266 |
| O    | -0.111245 | -2.538255 | 0.040331  |
| O    | -0.076261 | -1.093521 | -2.549114 |
| O    | 0.457218  | 1.648746  | -1.755562 |
| O    | 0.568512  | 1.637485  | 1.241626  |
| 50 O | 1.028622  | -0.956384 | 2.209569  |
| H    | -1.015373 | -2.789752 | 0.320590  |
| H    | 0.412027  | -1.936129 | -2.792690 |
| H    | -1.035693 | -1.234106 | -2.710384 |
| H    | 0.928428  | 2.498473  | -1.562215 |
| 55 H | -0.388037 | 1.861868  | -2.214741 |
| H    | 1.314587  | 1.814962  | 1.886636  |
| H    | 0.085389  | 2.500522  | 1.084677  |

|      |           |           |           |
|------|-----------|-----------|-----------|
| H    | 1.594692  | -1.783317 | 2.206422  |
| H    | 0.225875  | -1.156796 | 2.746398  |
| O    | 1.354485  | -3.341148 | -3.022699 |
| O    | -2.938808 | -0.631093 | -2.823158 |
| 5 O  | 1.744443  | 4.040112  | -1.073702 |
| O    | -2.179605 | 2.100584  | -2.800778 |
| O    | 2.714376  | 2.278930  | 2.723148  |
| O    | -0.584981 | 4.010382  | 0.673007  |
| O    | 2.613803  | -3.175816 | 2.044360  |
| 10 O | -1.575931 | -1.457671 | 3.366469  |
| H    | 2.171747  | -3.236082 | -3.539805 |
| H    | 1.619841  | -3.745305 | -2.156262 |
| H    | -3.343927 | -0.829871 | -3.686995 |
| H    | -2.723884 | 0.337487  | -2.835586 |
| 15 H | 2.047641  | 4.635830  | -1.782040 |
| H    | 2.558027  | 3.805293  | -0.547923 |
| H    | -2.608993 | 2.631728  | -2.074343 |
| H    | -2.283950 | 2.615046  | -3.621812 |
| H    | 3.298403  | 2.633185  | 2.011051  |
| 20 H | 3.184155  | 1.528696  | 3.127287  |
| H    | -1.441605 | 3.953946  | 0.196278  |
| H    | 0.085638  | 4.347413  | 0.042180  |
| H    | 2.458635  | -3.620858 | 1.173308  |
| H    | 3.569113  | -2.996726 | 2.089080  |
| 25 H | -1.605183 | -2.016921 | 4.164173  |
| H    | -2.037956 | -1.972021 | 2.652582  |
| H    | 0.900456  | -3.723533 | -0.199181 |
| O    | 1.721997  | -4.295533 | -0.403434 |
| H    | 1.461572  | -5.228339 | -0.303142 |
| 30 O | 3.976037  | 3.198504  | 0.353930  |
| H    | 4.758016  | 3.771289  | 0.451961  |
| H    | 4.298835  | 2.323692  | -0.030825 |
| O    | 4.644864  | 0.762970  | -0.490409 |
| H    | 3.818310  | 0.202607  | -0.515661 |
| 35 H | 5.137334  | 0.565483  | -1.305518 |
| O    | -3.157722 | 3.436280  | -0.596152 |
| H    | -3.825508 | 4.145737  | -0.606485 |
| H    | -3.503740 | 2.727944  | 0.018253  |
| O    | -3.823797 | 1.303908  | 0.931960  |
| 40 H | -3.730016 | 1.184865  | 1.921428  |
| H    | -4.353870 | 0.551823  | 0.585786  |
| H    | -2.311794 | 0.570740  | 0.392752  |
| O    | -3.301883 | 0.788561  | 3.529973  |
| O    | -4.425950 | -1.148798 | -0.459370 |
| 45 H | -2.630090 | 0.064022  | 3.565774  |
| H    | -2.983366 | 1.498412  | 4.114572  |
| H    | -3.886889 | -0.996935 | -1.280421 |
| H    | -5.288373 | -1.489112 | -0.759397 |
| O    | -2.827802 | -2.783566 | 1.233460  |
| 50 H | -3.396941 | -2.213257 | 0.655706  |
| H    | -3.316352 | -3.616006 | 1.363680  |

### **PaOOH<sup>2+</sup>/5/10/6**

67

|              |             |           |           |
|--------------|-------------|-----------|-----------|
| 55 scf done: | -835.380243 |           |           |
| Pa           | 0.021961    | -0.037890 | -0.335140 |
| O            | 1.586471    | -0.896529 | 0.201694  |

|      |           |           |           |
|------|-----------|-----------|-----------|
| O    | -1.788228 | 0.698819  | -0.961483 |
| H    | -2.652889 | 1.170274  | -0.648311 |
| O    | 0.025146  | -1.397291 | -2.394546 |
| O    | -1.161501 | -2.176398 | 0.182312  |
| 5 O  | -0.687897 | -0.011975 | 2.041587  |
| O    | 0.663861  | 2.096590  | 0.729624  |
| O    | 1.319778  | 1.217045  | -1.962211 |
| H    | -0.787936 | -1.401987 | -2.949454 |
| H    | 0.403345  | -2.330641 | -2.373956 |
| 10 H | -2.008071 | -2.467779 | -0.239233 |
| H    | -0.610815 | -2.965947 | 0.423066  |
| H    | -1.558158 | -0.397580 | 2.350877  |
| H    | 0.009449  | -0.287024 | 2.693558  |
| H    | 0.037308  | 2.686126  | 1.238237  |
| 15 H | 1.509948  | 2.593869  | 0.582767  |
| H    | 1.339450  | 2.210201  | -2.097386 |
| H    | 2.232195  | 0.877429  | -2.202882 |
| O    | -2.659107 | -0.868432 | -3.156178 |
| O    | 0.917062  | -3.887947 | -2.126095 |
| 20 O | -3.639635 | -2.468414 | -1.114330 |
| O    | 0.741196  | -4.152347 | 0.701586  |
| O    | -3.083664 | -1.011434 | 2.838489  |
| O    | 1.402194  | -0.872077 | 3.702155  |
| O    | -1.015375 | 3.802795  | 2.008005  |
| 25 O | 3.129891  | 3.362268  | 0.284632  |
| O    | 1.629724  | 3.877386  | -2.065916 |
| O    | 3.847621  | 0.373718  | -2.314734 |
| H    | -2.522943 | -0.050423 | -2.622137 |
| H    | -3.063694 | -0.602285 | -4.003085 |
| 30 H | -3.440985 | -1.988673 | -1.961732 |
| H    | -4.015349 | -3.333425 | -1.364563 |
| H    | -3.841374 | -0.969137 | 2.207379  |
| H    | -3.450999 | -0.915879 | 3.734669  |
| H    | -1.932959 | 4.004830  | 1.716657  |
| 35 H | -0.975945 | 3.982899  | 2.963466  |
| H    | 1.873787  | 4.409940  | -2.843701 |
| H    | 2.334234  | 3.992782  | -1.390500 |
| H    | 1.068667  | -4.094408 | -1.174775 |
| H    | 1.665969  | -4.252833 | -2.630125 |
| 40 H | 1.447568  | -3.807589 | 1.306885  |
| H    | 0.505592  | -5.037996 | 1.035291  |
| H    | 1.673214  | -1.802639 | 3.517418  |
| H    | 1.322602  | -0.794394 | 4.670615  |
| H    | 3.857754  | 2.686067  | 0.264716  |
| 45 H | 3.411890  | 4.053442  | 0.911815  |
| H    | 4.413131  | 0.650039  | -1.556450 |
| H    | 4.390935  | 0.418016  | -3.121151 |
| O    | 3.766345  | -0.692416 | 1.750824  |
| H    | 2.991657  | -0.740310 | 1.122956  |
| 50 H | 3.386642  | -0.294963 | 2.560909  |
| O    | -4.047803 | 1.699672  | -0.258094 |
| H    | -4.074949 | 2.516378  | 0.287575  |
| H    | -4.543504 | 0.981823  | 0.200347  |
| O    | -3.718537 | 4.286331  | 1.018616  |
| 55 O | -4.981556 | -0.795732 | 0.741206  |
| H    | -4.636064 | -1.425752 | 0.058631  |
| H    | -5.928371 | -1.001636 | 0.852710  |
| H    | -3.697418 | 4.923927  | 0.278497  |
| H    | -4.379423 | 4.643385  | 1.642786  |

|     |          |           |          |
|-----|----------|-----------|----------|
| O   | 2.672462 | -3.168433 | 2.563851 |
| O   | 4.969948 | 1.241423  | 0.175289 |
| H   | 3.317248 | -2.502613 | 2.213067 |
| H   | 3.199278 | -3.833831 | 3.045432 |
| 5 H | 4.694633 | 0.525110  | 0.812315 |
| H   | 5.929739 | 1.368246  | 0.294288 |

### Pa(OH)<sub>4</sub><sup>+</sup>/2/4/13

66

|              |             |           |           |
|--------------|-------------|-----------|-----------|
| 10 scf done: | -835.049279 |           |           |
| Pa           | 0.776950    | -0.591873 | -0.597835 |
| O            | -1.243198   | -0.751409 | 0.021344  |
| O            | 2.660787    | -0.180332 | -1.492783 |
| O            | 1.617602    | -2.345851 | 0.838017  |
| 15 O         | 1.233480    | 0.604412  | 1.023487  |
| O            | -3.073084   | 2.369404  | 1.822947  |
| O            | 0.093760    | 1.543690  | -1.521690 |
| O            | 0.299243    | -1.867365 | -2.235238 |
| H            | 2.107493    | -1.954529 | 1.659599  |
| 20 H         | 1.104293    | -3.114158 | 1.186456  |
| H            | 1.171591    | 1.376914  | 1.632205  |
| H            | -3.188116   | 3.149693  | 2.394916  |
| H            | -4.002633   | 2.065140  | 1.566151  |
| H            | 0.734826    | 2.257773  | -1.241840 |
| 25 H         | -0.814122   | 1.911059  | -1.291031 |
| H            | 0.963099    | -1.994631 | -2.971019 |
| O            | 2.642447    | -1.306196 | 2.979683  |
| O            | 0.259944    | -4.244215 | 2.439406  |
| O            | 1.777788    | 2.981611  | 2.330110  |
| 30 O         | -0.491540   | 5.050177  | -1.098144 |
| O            | -5.376527   | 1.377647  | 0.948853  |
| O            | 1.710932    | 3.530724  | -0.485132 |
| O            | -2.203940   | 2.770472  | -0.836607 |
| O            | 2.467996    | -1.713862 | -3.905028 |
| 35 H         | 3.028398    | -0.426500 | 2.779543  |
| H            | 1.773435    | -1.149694 | 3.433075  |
| H            | -0.457137   | -4.839342 | 2.151672  |
| H            | 0.892708    | -4.809614 | 2.921433  |
| H            | 1.478404    | 3.478080  | 3.112503  |
| 40 H         | 2.663175    | 2.588311  | 2.543254  |
| H            | -0.732776   | 5.813213  | -1.651104 |
| H            | -1.245777   | 4.416072  | -1.129616 |
| H            | -5.302915   | 1.421789  | -0.030722 |
| H            | -5.349553   | 0.418474  | 1.171397  |
| 45 H         | 1.629293    | 3.510551  | 0.497923  |
| H            | 1.131641    | 4.277578  | -0.786456 |
| H            | -2.983020   | 2.377685  | -1.303154 |
| H            | -2.417756   | 2.686989  | 0.129858  |
| H            | 3.119551    | -2.397855 | -4.137128 |
| 50 H         | 2.886517    | -1.136906 | -3.227158 |
| O            | 4.019741    | 1.392389  | 2.292991  |
| O            | -4.425670   | 1.279666  | -1.770538 |
| H            | 4.182504    | 1.536713  | 1.327738  |
| H            | 4.883462    | 1.481675  | 2.735501  |
| 55 H         | -4.170580   | 0.319440  | -1.723279 |
| H            | -4.940087   | 1.398861  | -2.588998 |
| H            | 3.313503    | 0.513075  | -1.228193 |

|      |           |           |           |
|------|-----------|-----------|-----------|
| H    | -2.106240 | -0.948650 | -0.445760 |
| O    | 4.099288  | 2.083514  | -0.499552 |
| O    | -3.634755 | -1.283742 | -1.150659 |
| H    | 3.374691  | 2.748600  | -0.629152 |
| 5 H  | 4.885103  | 2.440228  | -0.952184 |
| H    | -4.122738 | -1.611768 | -0.360111 |
| H    | -3.325298 | -2.056184 | -1.700962 |
| H    | -2.449893 | 0.673721  | 2.537235  |
| O    | -2.253496 | -0.292730 | 2.510912  |
| 10 H | -1.796418 | -0.417672 | 1.634960  |
| O    | -4.620798 | -1.326898 | 1.516401  |
| O    | 0.013853  | -1.478764 | 3.898532  |
| H    | -3.803573 | -1.054260 | 2.021525  |
| H    | -5.129478 | -1.922907 | 2.094782  |
| 15 H | -0.151249 | -2.411627 | 3.661120  |
| H    | -0.772190 | -0.983503 | 3.569704  |
| H    | -1.296821 | -2.749863 | -2.509409 |
| O    | -2.212330 | -3.131213 | -2.509706 |
| H    | -2.359942 | -3.510550 | -3.393147 |

20

### Pa(OH)<sub>3</sub><sup>2+</sup> 4/8/8

67

scf done: -835.360615

|      |           |           |           |
|------|-----------|-----------|-----------|
| Pa   | 0.354106  | -0.194959 | 0.189991  |
| 25 O | 0.875959  | 1.760273  | 0.039387  |
| O    | 0.057543  | -2.216417 | 0.152008  |
| O    | -0.809122 | -0.117800 | -2.009416 |
| O    | -1.656151 | 0.364812  | 0.619469  |
| O    | 0.110335  | -0.246765 | 2.627722  |
| 30 O | 2.610284  | -0.258476 | 1.236452  |
| O    | 1.896015  | -0.685266 | -1.630691 |
| H    | -0.923259 | -0.917059 | -2.578255 |
| H    | -1.590352 | 0.475531  | -2.178110 |
| H    | -2.511061 | 0.001118  | 0.265410  |
| 35 H | -0.805437 | -0.264639 | 3.022003  |
| H    | 0.764197  | -0.552428 | 3.309042  |
| H    | 3.217753  | -1.032897 | 1.309125  |
| H    | 3.175108  | 0.536924  | 0.987635  |
| H    | 2.548742  | -1.441061 | -1.634183 |
| 40 H | 2.205941  | 0.025367  | -2.271196 |
| O    | -1.701903 | -2.483865 | -3.317176 |
| O    | -3.063056 | 1.456735  | -2.289988 |
| O    | -4.116824 | -0.291975 | -0.417176 |
| O    | -2.428837 | -0.216911 | 3.718564  |
| 45 O | 1.876638  | -1.156745 | 4.574360  |
| O    | 4.504874  | -2.425696 | 1.265027  |
| O    | 4.137153  | 1.820291  | 0.447898  |
| O    | 3.606215  | -2.780965 | -1.448874 |
| O    | 2.603854  | 1.324201  | -3.239471 |
| 50 H | -2.653796 | -2.499853 | -3.057163 |
| H    | -1.666005 | -2.615974 | -4.282927 |
| H    | -3.537429 | 1.614549  | -3.127132 |
| H    | -3.676450 | 0.951953  | -1.697134 |
| H    | -4.630516 | -0.124001 | 0.409510  |
| 55 H | -4.241643 | -1.227865 | -0.699815 |
| H    | -2.682528 | -0.474459 | 4.622387  |
| H    | -3.266432 | -0.056962 | 3.224599  |

|      |           |           |           |
|------|-----------|-----------|-----------|
| H    | 1.579341  | -1.829958 | 5.214098  |
| H    | 2.354132  | -0.488506 | 5.099781  |
| H    | 4.328605  | -3.177313 | 1.862871  |
| H    | 5.419053  | -2.143846 | 1.461389  |
| 5 H  | 3.747661  | 2.440122  | -0.213892 |
| H    | 4.662532  | 2.364893  | 1.060215  |
| H    | 4.107552  | -2.786798 | -0.604634 |
| H    | 4.199539  | -3.121228 | -2.141824 |
| H    | 2.821768  | 2.166460  | -2.771885 |
| 10 H | 3.150510  | 1.284083  | -4.043511 |
| O    | -3.948744 | -2.881230 | -1.616618 |
| O    | 3.035562  | 3.583292  | -1.598424 |
| H    | -3.321400 | -3.499113 | -1.172225 |
| H    | -4.755459 | -3.396264 | -1.806775 |
| 15 H | 2.140646  | 3.957525  | -1.401148 |
| H    | 3.574891  | 4.321947  | -1.937263 |
| H    | -0.432458 | -3.027511 | -0.147451 |
| H    | 0.734427  | 2.751663  | -0.047593 |
| O    | -1.456316 | -4.178107 | -1.098585 |
| 20 O | 0.496255  | 4.324851  | -0.583283 |
| H    | -1.224745 | -5.123873 | -1.040035 |
| H    | -1.255687 | -3.884152 | -2.018604 |
| H    | 0.552095  | 5.089898  | 0.018482  |
| H    | -0.480864 | 4.237237  | -0.834453 |
| 25 H | -2.249663 | 1.865412  | 1.339386  |
| O    | -2.845213 | 2.629436  | 1.578263  |
| H    | -2.487443 | 3.020582  | 2.396143  |
| O    | -4.723684 | 0.670876  | 2.140107  |
| O    | -2.104186 | 3.890303  | -0.919169 |
| 30 H | -4.278771 | 1.545463  | 1.986989  |
| H    | -5.590734 | 0.859657  | 2.544652  |
| H    | -2.419870 | 3.180299  | -1.519182 |
| H    | -2.479349 | 3.657487  | -0.039610 |

35 **Pa(OH)<sub>2</sub><sup>3+</sup>/5/10/4**

62

scf done: -801.138368

|      |           |           |           |
|------|-----------|-----------|-----------|
| Pa   | 0.000000  | 0.000000  | 0.243838  |
| O    | 1.839729  | -0.804760 | 0.202592  |
| 40 O | -1.839729 | 0.804760  | 0.202592  |
| O    | 0.500916  | 1.299106  | -1.730247 |
| O    | 0.876990  | 2.104853  | 0.987974  |
| O    | 0.000000  | 0.000000  | 2.652780  |
| O    | -0.876990 | -2.104853 | 0.987974  |
| 45 O | -0.500916 | -1.299106 | -1.730247 |
| H    | -0.233357 | 1.553353  | -2.380421 |
| H    | 1.183310  | 2.026298  | -1.775271 |
| H    | 0.452281  | 2.969050  | 0.723126  |
| H    | 1.880000  | 2.278978  | 1.013788  |
| 50 H | 0.068938  | 0.804344  | 3.248424  |
| H    | -0.068938 | -0.804344 | 3.248424  |
| H    | -1.880000 | -2.278978 | 1.013788  |
| H    | -0.452281 | -2.969050 | 0.723126  |
| H    | -1.183310 | -2.026298 | -1.775271 |
| 55 H | 0.233357  | -1.553353 | -2.380421 |
| O    | -1.496660 | 2.161129  | -3.229025 |
| O    | 2.148977  | 3.521084  | -1.686408 |



|    |   |           |           |           |
|----|---|-----------|-----------|-----------|
|    | O | 0.000000  | 4.492213  | -0.109737 |
|    | O | 3.429448  | 2.565094  | 0.663243  |
|    | O | 0.100523  | 2.089475  | 4.386213  |
|    | O | -0.100523 | -2.089475 | 4.386213  |
| 5  | O | -3.429448 | -2.565094 | 0.663243  |
|    | O | 0.000000  | -4.492213 | -0.109737 |
|    | O | -2.148977 | -3.521084 | -1.686408 |
|    | O | 1.496660  | -2.161129 | -3.229025 |
|    | H | -1.839830 | 3.020244  | -2.889352 |
| 10 | H | -1.536953 | 2.187739  | -4.202820 |
|    | H | 2.525474  | 3.916848  | -2.496141 |
|    | H | 1.501809  | 4.168275  | -1.317221 |
|    | H | -0.874774 | 4.504704  | -0.580420 |
|    | H | 0.035176  | 5.307966  | 0.426527  |
| 15 | H | 4.088322  | 2.999912  | 1.236034  |
|    | H | 3.409196  | 3.048790  | -0.192271 |
|    | H | 0.898566  | 2.315043  | 4.900091  |
|    | H | -0.652940 | 2.269776  | 4.979448  |
|    | H | -0.898566 | -2.315043 | 4.900091  |
| 20 | H | 0.652940  | -2.269776 | 4.979448  |
|    | H | -4.088322 | -2.999912 | 1.236034  |
|    | H | -3.409196 | -3.048790 | -0.192271 |
|    | H | 0.874774  | -4.504704 | -0.580420 |
|    | H | -0.035176 | -5.307966 | 0.426527  |
| 25 | H | -2.525474 | -3.916848 | -2.496141 |
|    | H | -1.501809 | -4.168275 | -1.317221 |
|    | H | 1.839830  | -3.020244 | -2.889352 |
|    | H | 1.536953  | -2.187739 | -4.202820 |
|    | O | -2.405931 | 4.285366  | -1.566326 |
| 30 | O | 2.405931  | -4.285366 | -1.566326 |
|    | H | -3.119969 | 3.788679  | -1.101291 |
|    | H | -2.811473 | 5.110195  | -1.898883 |
|    | H | 3.119969  | -3.788679 | -1.101291 |
|    | H | 2.811473  | -5.110195 | -1.898883 |
| 35 | H | -2.715405 | 1.268381  | 0.058776  |
|    | H | 2.715405  | -1.268381 | 0.058776  |
|    | O | -4.107769 | 2.310300  | -0.293532 |
|    | O | 4.107769  | -2.310300 | -0.293532 |
|    | H | -4.658406 | 2.543651  | 0.480846  |
| 40 | H | -4.726698 | 1.909475  | -0.936709 |
|    | H | 4.658406  | -2.543651 | 0.480846  |
|    | H | 4.726698  | -1.909475 | -0.936709 |

45 **PaO<sup>3+</sup>/6/14**

62

scf done: -801.128865

|    |    |           |           |           |
|----|----|-----------|-----------|-----------|
|    | Pa | -0.017985 | -0.167059 | -0.082449 |
|    | O  | 1.139199  | -1.512164 | -0.527593 |
| 50 | O  | 1.503473  | 1.619532  | 0.600891  |
|    | O  | 0.636952  | -0.692876 | 2.138850  |
|    | O  | -1.617995 | -1.800354 | 0.595335  |
|    | O  | -1.675992 | -0.386344 | -1.895821 |
|    | O  | 0.793937  | 0.870402  | -2.073655 |
| 55 | H  | 1.564709  | 2.012775  | 1.517047  |
|    | H  | 2.372345  | 1.818057  | 0.127413  |
|    | H  | 0.362444  | -0.251347 | 3.013371  |

|      |           |           |           |
|------|-----------|-----------|-----------|
| H    | 1.266069  | -1.456755 | 2.311770  |
| H    | -2.617387 | -1.801719 | 0.655434  |
| H    | -1.252455 | -2.645910 | 1.037409  |
| H    | -1.515199 | 0.128841  | -2.710890 |
| 5 H  | -2.498792 | -0.952170 | -2.051457 |
| H    | 1.054294  | 1.844650  | -2.211255 |
| H    | 1.432284  | 0.326152  | -2.660057 |
| O    | 3.809711  | 2.048125  | -0.732028 |
| O    | 2.185356  | -2.906321 | 2.270914  |
| 10 O | -0.507744 | -3.855787 | 1.775414  |
| O    | -4.024305 | -1.610616 | -2.274072 |
| O    | 2.539047  | -0.526831 | -3.418441 |
| O    | 1.327437  | 2.893134  | 3.045132  |
| O    | -0.087397 | 0.724715  | 4.206405  |
| 15 O | -4.333588 | -1.615073 | 0.505917  |
| O    | -4.749532 | 1.170582  | -2.300612 |
| O    | 1.739002  | 3.307169  | -2.300933 |
| H    | 4.525029  | 2.569615  | -0.319259 |
| H    | 4.219897  | 1.184892  | -1.009919 |
| 20 H | 2.668480  | -3.203577 | 3.066437  |
| H    | 2.834700  | -2.914425 | 1.521275  |
| H    | -0.756824 | -4.797864 | 1.747434  |
| H    | 0.457353  | -3.800162 | 1.958019  |
| H    | -4.179304 | -2.343377 | -2.901939 |
| 25 H | -4.361609 | -1.898132 | -1.391880 |
| H    | 2.665679  | -0.551162 | -4.385015 |
| H    | 3.427984  | -0.544036 | -2.990462 |
| H    | 0.615671  | 3.535636  | 2.821541  |
| H    | 2.053982  | 3.404031  | 3.453034  |
| 30 H | -0.221204 | 0.435055  | 5.128629  |
| H    | 0.486275  | 1.522059  | 4.216646  |
| H    | -4.525803 | -0.651917 | 0.623113  |
| H    | -4.940310 | -2.110852 | 1.090388  |
| H    | -5.429702 | 1.689801  | -2.770413 |
| 35 H | -4.835420 | 0.238496  | -2.596021 |
| H    | 2.679942  | 3.188515  | -2.048405 |
| H    | 1.717252  | 3.870050  | -3.097975 |
| H    | 2.772645  | -2.666768 | -0.657990 |
| O    | 3.633389  | -2.755932 | -0.191879 |
| 40 H | 4.031248  | -3.596845 | -0.492338 |
| H    | 4.508878  | -1.253620 | -1.010592 |
| O    | 4.705168  | -0.471959 | -1.587032 |
| H    | 5.641258  | -0.556195 | -1.855316 |
| O    | -1.578131 | 1.519360  | 0.615950  |
| 45 H | -2.591608 | 1.444983  | 0.492116  |
| H    | -1.382996 | 2.401812  | 1.045688  |
| O    | -4.193869 | 1.194525  | 0.290549  |
| O    | -1.073341 | 3.977997  | 1.870512  |
| H    | -0.970775 | 4.742741  | 1.268279  |
| 50 H | -1.740674 | 4.259591  | 2.528871  |
| H    | -4.795069 | 1.764349  | 0.809323  |
| H    | -4.472870 | 1.286850  | -0.679573 |
